# Supplementary material for: Continuous Aging of the Human DNA Methylome Throughout the Human Lifespan
Source: PLoS One. 2013 Jun 27;8(6):e67378. doi: 10.1371/journal.pone.0067378 (PMC3695075; doi:10.1371/journal.pone.0067378)
Supplement: Table S5 — The most enriched biological processes (FDR P-value<0.0001) among hypomethylated CGIs. (XLSX) [file pone.0067378.s009.xlsx]

## Sheet: HYPO.txt
GO Term	Description	P-value	FDR q-value	Enrichment	N	B	n	b	Genes
GO:0022610	biological adhesion	2.73e-09	2.79e-05	2.97	13058	533	305	37	[KIFC3 - kinesin family member c3, PTPRF - protein tyrosine phosphatase, receptor type, f, JUP - junction plakoglobin, BAI1 - brain-specific angiogenesis inhibitor 1, BCAR1 - breast cancer anti-estrogen resistance 1, CX3CL1 - chemokine (c-x3-c motif) ligand 1, CDH22 - cadherin 22, type 2, APOA4 - apolipoprotein a-iv, CLDN19 - claudin 19, AJAP1 - adherens junctions associated protein 1, CELSR3 - c…
GO:0007155	cell adhesion	2.73e-09	1.4e-05	2.97	13058	533	305	37	[KIFC3 - kinesin family member c3, PTPRF - protein tyrosine phosphatase, receptor type, f, JUP - junction plakoglobin, BAI1 - brain-specific angiogenesis inhibitor 1, BCAR1 - breast cancer anti-estrogen resistance 1, CX3CL1 - chemokine (c-x3-c motif) ligand 1, CDH22 - cadherin 22, type 2, APOA4 - apolipoprotein a-iv, CLDN19 - claudin 19, AJAP1 - adherens junctions associated protein 1, CELSR3 - c…
GO:0051239	regulation of multicellular organismal process	1.85e-08	6.34e-05	2.07	13058	1282	305	62	[CARD9 - caspase recruitment domain family, member 9, WNT9A - wingless-type mmtv integration site family, member 9a, WNT11 - wingless-type mmtv integration site family, member 11, PALM - paralemmin, PTPRF - protein tyrosine phosphatase, receptor type, f, CX3CL1 - chemokine (c-x3-c motif) ligand 1, CHRNA3 - cholinergic receptor, nicotinic, alpha 3 (neuronal), SLC6A1 - solute carrier family 6 (neur…
GO:0032501	multicellular organismal process	1.42e-07	0.000363	1.8	13058	1811	305	76	[WNT9A - wingless-type mmtv integration site family, member 9a, OMP - olfactory marker protein, KIFC3 - kinesin family member c3, WNT11 - wingless-type mmtv integration site family, member 11, APCDD1 - adenomatosis polyposis coli down-regulated 1, BCAR1 - breast cancer anti-estrogen resistance 1, GNG7 - guanine nucleotide binding protein (g protein), gamma 7, DLK1 - delta-like 1 homolog (drosophi…
GO:0032502	developmental process	1.47e-07	0.000302	1.59	13058	2829	305	105	[GRIN3A - glutamate receptor, ionotropic, n-methyl-d-aspartate 3a, OMP - olfactory marker protein, PALM - paralemmin, APCDD1 - adenomatosis polyposis coli down-regulated 1, CX3CL1 - chemokine (c-x3-c motif) ligand 1, DLK1 - delta-like 1 homolog (drosophila), KLF6 - kruppel-like factor 6, FLT4 - fms-related tyrosine kinase 4, EBF3 - early b-cell factor 3, MYT1 - myelin transcription factor 1, SPEG…
GO:0007166	cell surface receptor signaling pathway	5.71e-07	0.000975	1.87	13058	1442	305	63	[WNT9A - wingless-type mmtv integration site family, member 9a, WNT11 - wingless-type mmtv integration site family, member 11, PTPRF - protein tyrosine phosphatase, receptor type, f, APCDD1 - adenomatosis polyposis coli down-regulated 1, BCAR1 - breast cancer anti-estrogen resistance 1, GNG7 - guanine nucleotide binding protein (g protein), gamma 7, CX3CL1 - chemokine (c-x3-c motif) ligand 1, DLK…
